# Supplementary material for: Synthesis and Application Studies of DOPO-Based Organophosphorous Derivatives to Modify the Thermal Behavior of Polybenzoxazine
Source: MDPI journal article supplement (doi:10.3390/polym14030606), 2022-02-03
Supplement: s1 [file s1]

## Supporting Information

# Synthesis and Application Studies of DOPO-Based Organophosphorous Derivatives to Modify the Thermal Behavior of Polybenzoxazine

Thorben Sören Haubold<sup>1,2</sup>, Andreas Hartwig<sup>1,2</sup>, Katharina Koschek<sup>1\*</sup>

<sup>1</sup> Fraunhofer Institute for Manufacturing Technology and Advanced Materials IFAM, Wiener Strasse 12, 28359 Bremen, Germany; Thorben.Haubold@ifam.fraunhofer.de (T.S.H.); Andreas.Hartwig@ifam.fraunhofer.de (A.H.)

<sup>2</sup> University of Bremen, Department 2 Biology/Chemistry, Leobener Strasse 7, 28359 Bremen, Germany

\* Correspondence: Katharina.Koschek@ifam.fraunhofer.de

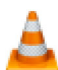

Video S1a.mp4

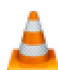

Video S1b.mp4



Video S1c.mp4

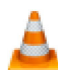

Video S1d.mp4

**Video S1.** Burning test of pBF-a (**a**) and mixtures with 3 mol% of DOPO-AP (**b**), DOPO-HQ (**c**) and DOPO-Van (**d**).

Sample burning videos according to UL94 test. However, the specimen were not according to DIN EN 60695-11-10 and differ in burning time in comparison to the specimen in the manuscript.

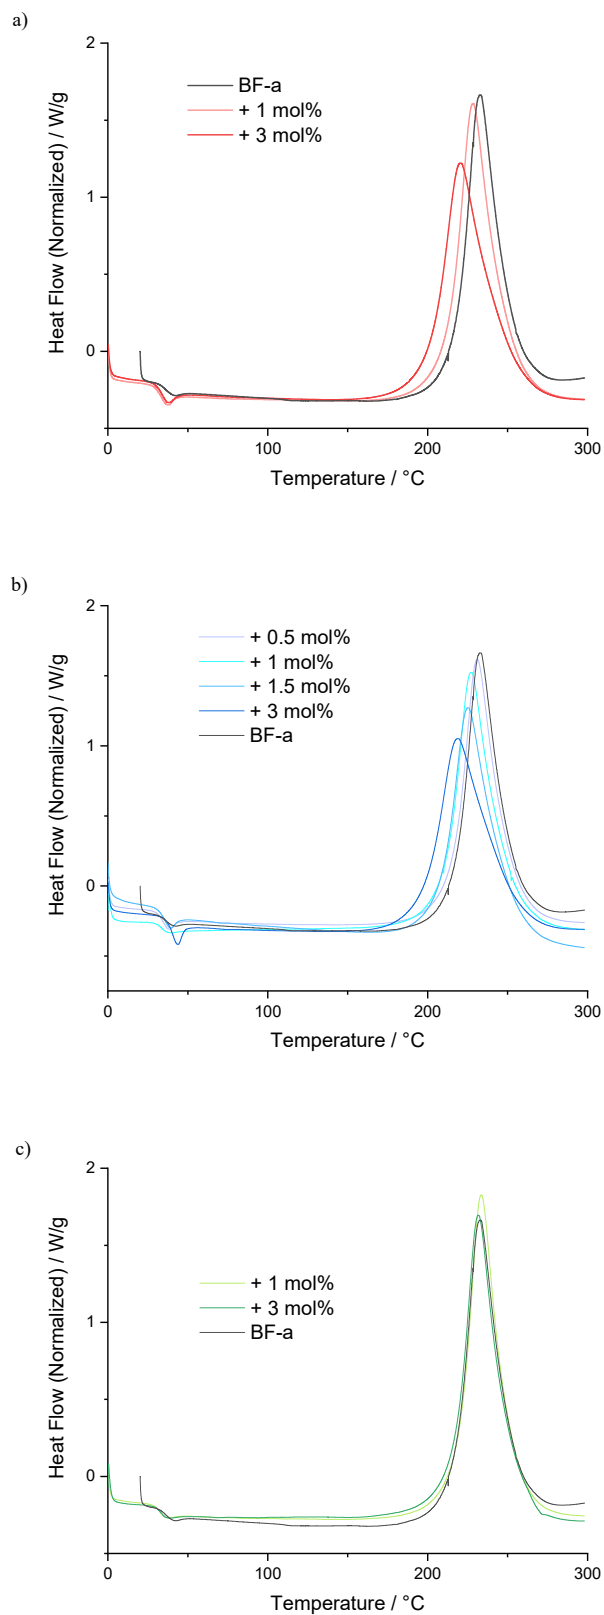

**Figure S1.** DSC comparison between BF-a and different concentrations of the corresponding additive DOPO-AP (a), DOPO-Van (b), DOPO-HQ (c).

**Table S1.** DSC results of BF-a and FR mixtures.

| Sample<br>(Composition) | Quantity<br>[mol%] | T <sub>op</sub><br>[°C] | T <sub>max</sub><br>[°C] | ΔH <sub>p</sub><br>[J/g]s | ΔH <sub>pm</sub><br>[kJ/mol] |
|-------------------------|--------------------|-------------------------|--------------------------|---------------------------|------------------------------|
| BF-a                    | 0                  | 217                     | 233                      | 290 ± 2                   | 126 ± 1                      |
| + DOPO-AP               | 1                  | 210                     | 229                      | 302 ± 11                  | 131 ± 5                      |
| + DOPO-AP               | 3                  | 201                     | 220                      | 315 ± 4                   | 137 ± 2                      |
| + DOPO-Van              | 0.5                | 214                     | 230                      | 305 ± 4                   | 133 ± 2                      |
| + DOPO-Van              | 1                  | 211                     | 228                      | 292 ± 14                  | 128 ± 6                      |
| + DOPO-Van              | 1.5                | 207                     | 225                      | 304 ± 3                   | 134 ± 1                      |
| + DOPO-Van              | 3                  | 198                     | 220                      | 285 ± 10                  | 128 ± 4                      |
| + DOPO-HQ               | 1                  | 218                     | 233                      | 305 ± 7                   | 132 ± 3                      |
| + DOPO-HQ               | 3                  | 216                     | 231                      | 297 ± 3                   | 128 ± 1                      |

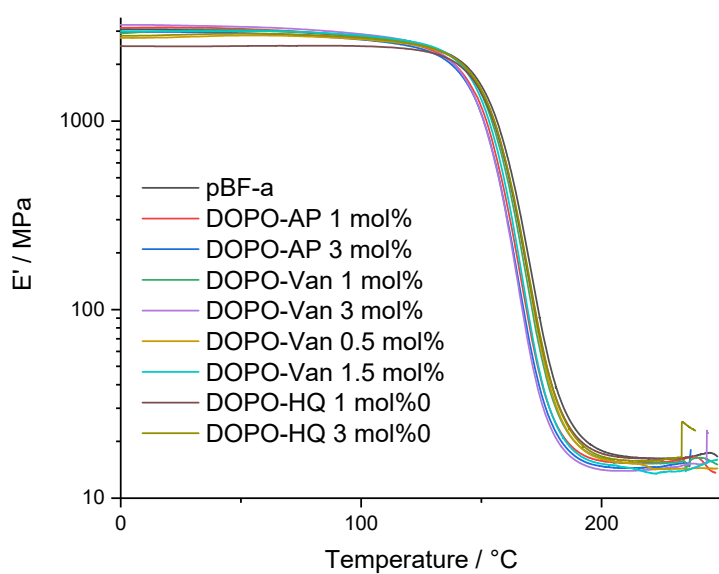

**Figure S2.** Storage modulus of cured pBF-a and reactive mixtures.

**Table S2.** Test results for DMA experiments.

| Sample (Composition) | Quantity [mol%] | E' [GPa] | T <sub>g</sub> E'' [°C] | T <sub>g</sub> tan(δ) [°C] |
|----------------------|-----------------|----------|-------------------------|----------------------------|
| pBF-a                |                 | 2.8      | 157                     | 176                        |
| + DOPO-AP            | 1               | 2.8      | 153                     | 172                        |
| + DOPO-AP            | 3               | 2.7      | 153                     | 172                        |
| + DOPO-Van           | 0.5             | 2.7      | 155                     | 174                        |
| + DOPO-Van           | 1               | 2.8      | 151                     | 170                        |
| + DOPO-Van           | 1.5             | 2.8      | 156                     | 174                        |
| + DOPO-Van           | 3               | 2.9      | 153                     | 172                        |
| + DOPO-HQ            | 1               | 2.5      | 156                     | 175                        |
| + DOPO-HQ            | 3               | 2.8      | 155                     | 175                        |

E' Storage modulus at 100 °C; T<sub>g</sub> E'' Glass transition temperature determined by maximum of loss modulus; T<sub>g</sub> tan(δ) Glass transition temperature determined by the maximum of the tan(δ)

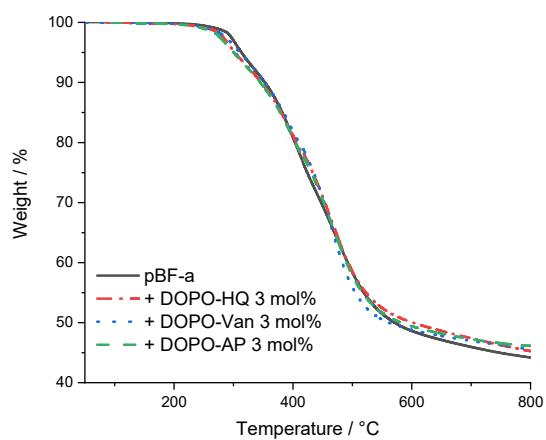

**Figure S3.** Thermal decomposition of pBF-a and FR mixtures.

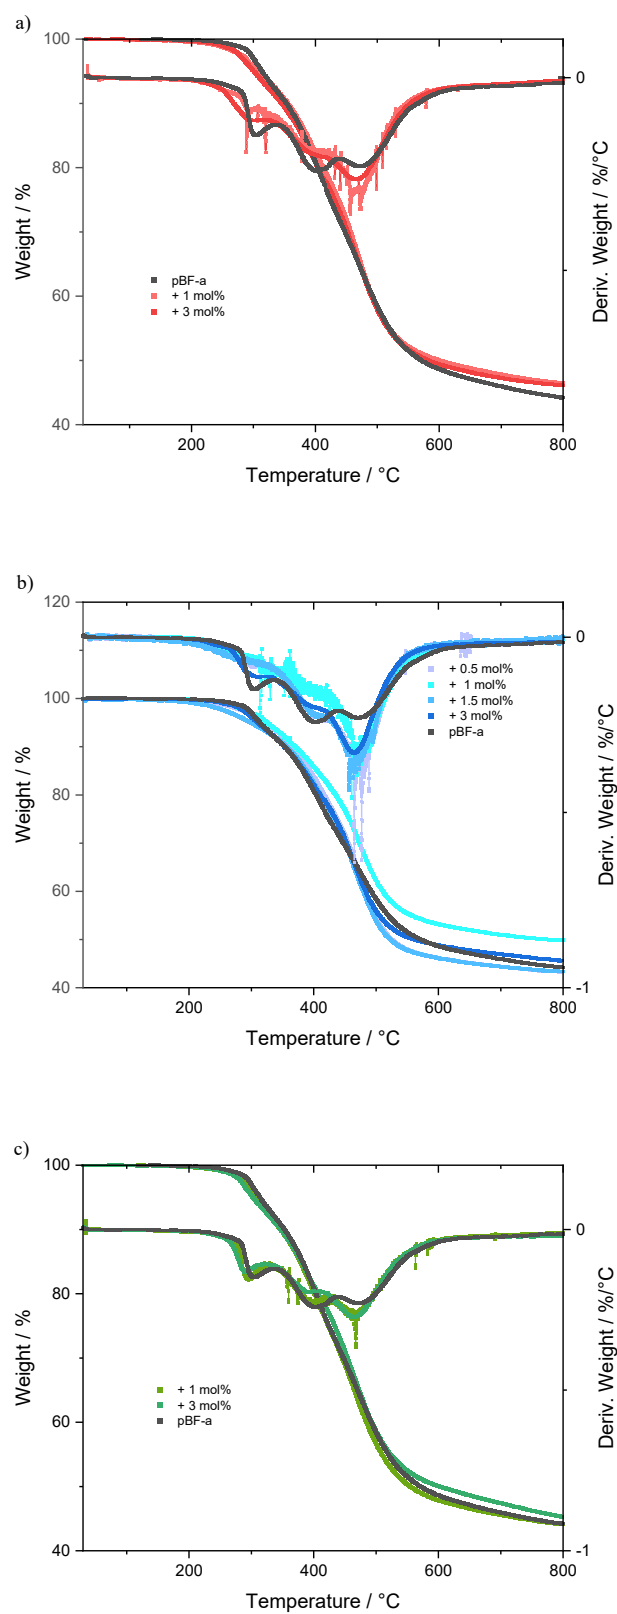

**Figure S4.** Comparison between thermal decomposition of pBF-a and different concentrations of the FR additives DOPO-AP (a)), DOPO-Van (b) and DOPO-HQ (c).

**Table S3.** TGA test results of pBF-a and FR mixtures under nitrogen atmosphere.

| Sample (Composition) | Quantity [mol%] | T <sub>2%</sub> [°C] | T <sub>5%</sub> [°C] | T <sub>10%</sub> [°C] | T <sub>20%</sub> [°C] | Y <sub>c</sub> [%] |
|----------------------|-----------------|----------------------|----------------------|-----------------------|-----------------------|--------------------|
| pBF-a                |                 | 292                  | 313                  | 352                   | 407                   | 44                 |
| + DOPO-AP            | 1               | 271                  | 310                  | 356                   | 412                   | 47                 |
| + DOPO-AP            | 3               | 278                  | 306                  | 350                   | 408                   | 46                 |
| + DOPO-Van           | 0.5             | 276                  | 321                  | 367                   | 417                   | 43                 |
| + DOPO-Van           | 1               | 281                  | 325                  | 370                   | 435                   | 50                 |
| + DOPO-Van           | 1.5             | 279                  | 322                  | 362                   | 413                   | 43                 |
| + DOPO-Van           | 3               | 286                  | 316                  | 358                   | 410                   | 46                 |
| + DOPO-HQ            | 1               | 283                  | 305                  | 345                   | 400                   | 44                 |
| + DOPO-HQ            | 3               | 284                  | 308                  | 352                   | 410                   | 45                 |

T<sub>2%</sub> temperature at 2% weight loss; T<sub>5%</sub> temperature at 5% weight loss; T<sub>10%</sub> temperature at 10% weight loss; T<sub>20%</sub> temperature at 20% weight loss; Y<sub>c</sub> residual mass recorded at 800 °C.

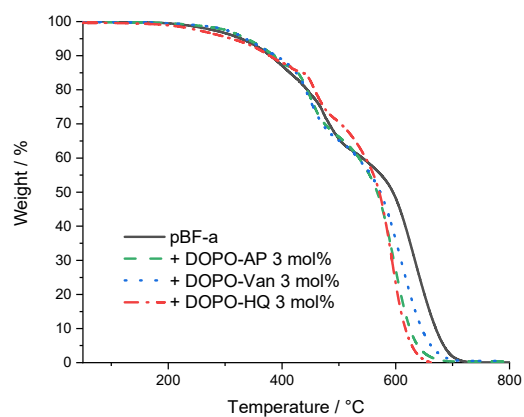

**Figure S5.** Thermo-oxidative decomposition of pBF-a and mixtures with 3 mol% FR.

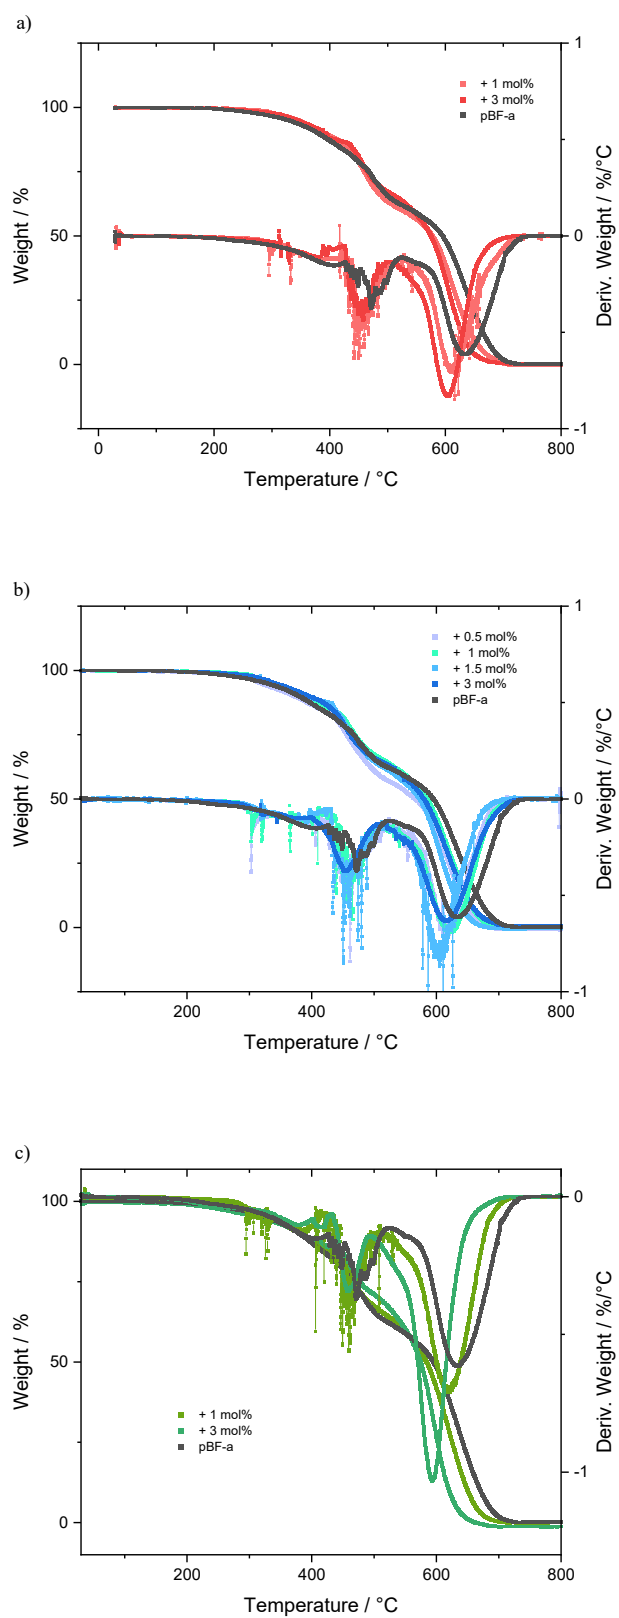

**Figure S6.** Comparison between results of thermo-oxidative decomposition pBF-a and different concentrations of the FR additives DOPO-AP (a)), DOPO-Van (b) and DOPO-HQ (c).

**Tabelle S4.** Results of thermo-oxidative decomposition of pBF-a and FR additives.

| <b>Sample<br/>(Composition)</b> | <b>Quantity<br/>[mol%]</b> | <b>T<sub>1st</sub> [°C]</b> | <b>T<sub>2nd</sub> [°C]</b> | <b>T<sub>3rd</sub> [°C]</b> | <b>Y<sub>c</sub> [%]</b> |
|---------------------------------|----------------------------|-----------------------------|-----------------------------|-----------------------------|--------------------------|
| pBF-a                           |                            | 304                         | 401                         | 472                         | 0                        |
| + DOPO-AP                       | 1                          | 302                         | 401                         | 468                         | 0                        |
| + DOPO-AP                       | 3                          | 305                         | 399                         | 467                         | 0                        |
| + DOPO-Van                      | 0.5                        | 298                         | 401                         | 473                         | 0                        |
| + DOPO-Van                      | 1                          | 287                         | 398                         | 472                         | 0                        |
| + DOPO-Van                      | 1.5                        | 288                         | 403                         | 467                         | 0                        |
| + DOPO-Van                      | 3                          | 303                         | 401                         | 464                         | 0                        |
| + DOPO-HQ                       | 1                          | 295                         | 397                         | 464                         | 0                        |
| + DOPO-HQ                       | 3                          | 292                         | 394                         | 468                         | 0                        |

T<sub>1st</sub> temperature at the peak of the 1<sup>st</sup> degradation step; T<sub>2nd</sub> temperature at the peak of the 2<sup>nd</sup> degradation step; T<sub>3rd</sub> temperature at the peak of the 3<sup>rd</sup> degradation step, each degradation step temperature was determined by the maximum of the weight-loss derivative, respectively; Y<sub>c</sub> residual mass recorded at 800 °C.



**Table S5.** TGA test results of pBF-a and FR mixtures under ambient atmosphere.

| Sample (Composition) | Quantity [mol%] | T <sub>2%</sub> [°C] | T <sub>5%</sub> [°C] | T <sub>10%</sub> [°C] | Y <sub>c</sub> [%] |
|----------------------|-----------------|----------------------|----------------------|-----------------------|--------------------|
| pBF-a                |                 | 265                  | 328                  | 380                   | 0                  |
| + DOPO-AP            | 1               | 290                  | 345                  | 391                   | 0                  |
| + DOPO-AP            | 3               | 294                  | 344                  | 392                   | 0                  |
| + DOPO-Van           | 0.5             | 283                  | 319                  | 373                   | 0                  |
| + DOPO-Van           | 1               | 303                  | 335                  | 382                   | 0                  |
| + DOPO-Van           | 1.5             | 297                  | 337                  | 392                   | 0                  |
| + DOPO-Van           | 3               | 299                  | 342                  | 396                   | 0                  |
| + DOPO-HQ            | 1               | 298                  | 332                  | 383                   | 0                  |
| + DOPO-HQ            | 3               | 277                  | 327                  | 381                   | 0                  |

T<sub>2</sub> temperature at 2% weight loss; T<sub>5</sub> temperature at 5% weight loss; T<sub>10</sub> temperature at 10% weight loss; Y<sub>c</sub> residual mass recorded at 800 °C.

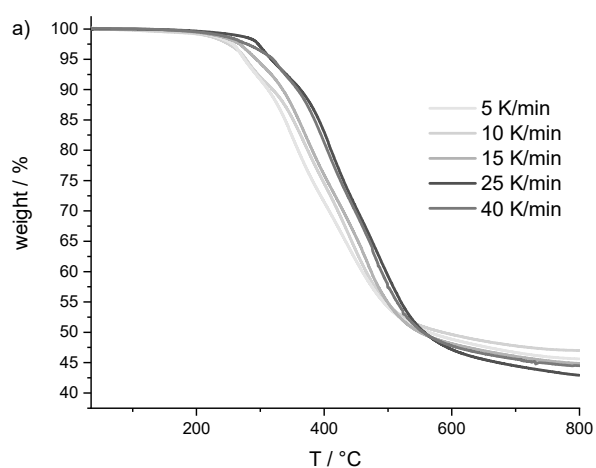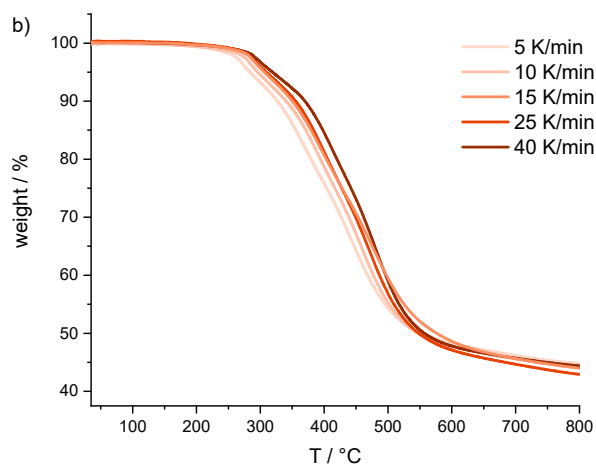

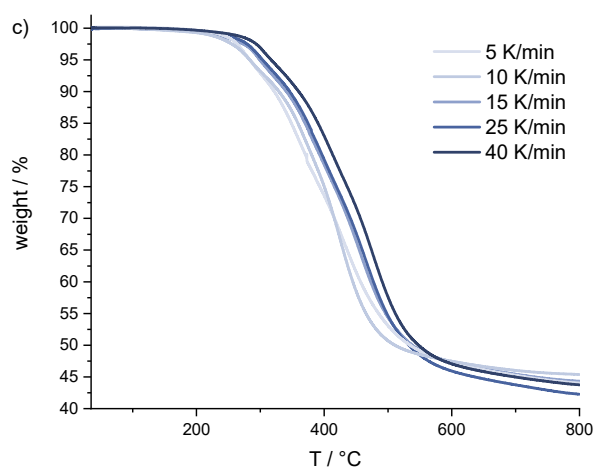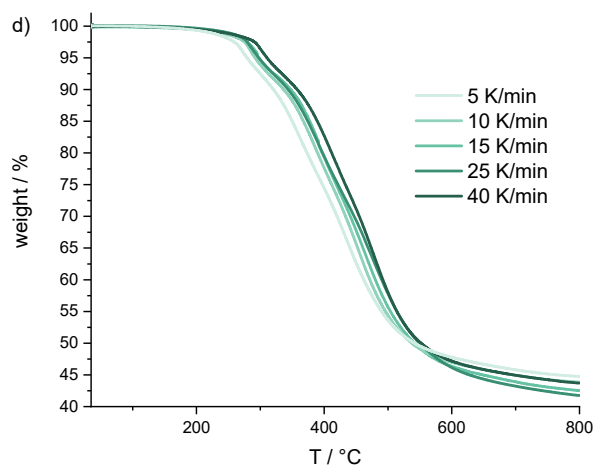

**Figure S7.** TGA thermograms of pBF-a (a) and mixturse with 3 mol% of DOPO-AP (b), DOPO-Van (c) and DOPO-HQ (d), respectively, at different heating rates (2, 5, 10, 20 and 40 K/min).

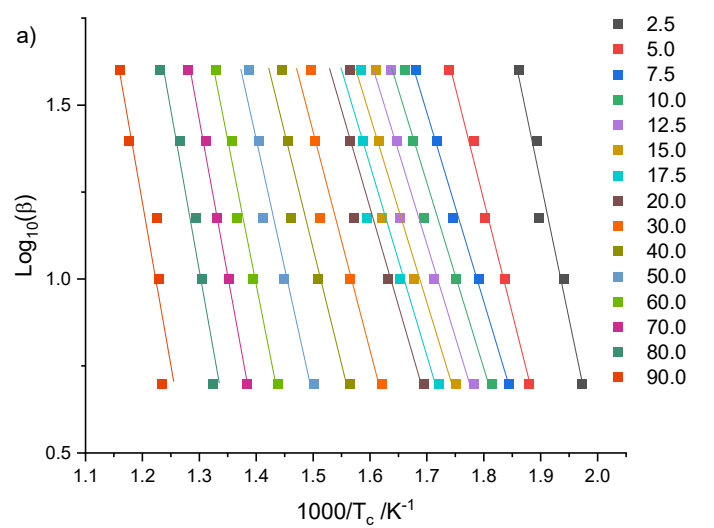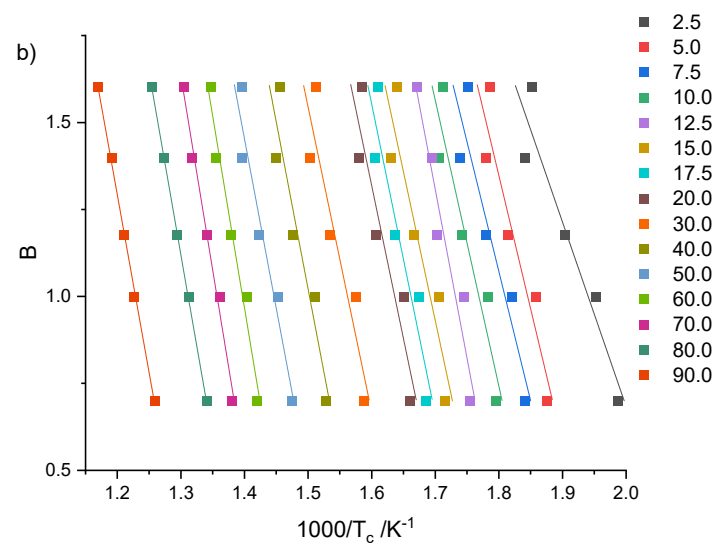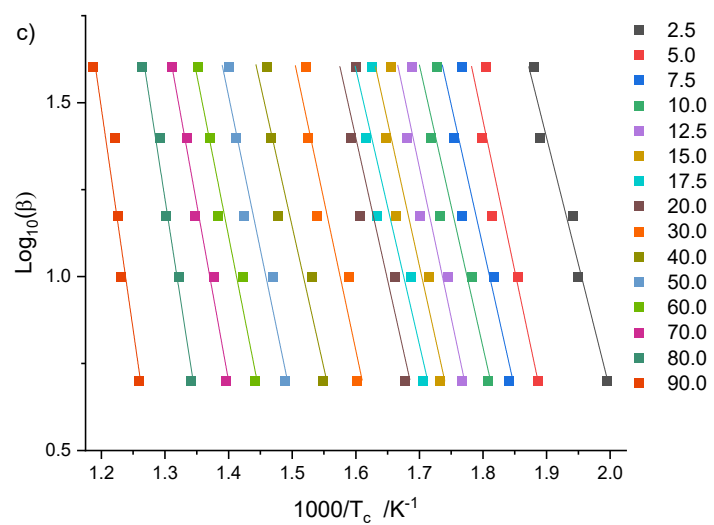

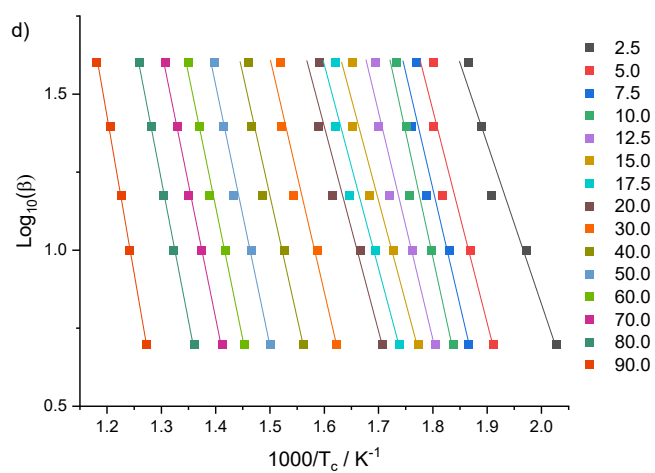

**Figure S8.** Flynn-Wall-Ozawa isoconversion plot with different heating reats for the calculation of activation energy for pBF-a (a) and mixturse with 3 mol% of DOPO-AP (b), DOPO-Van (c) and DOPO-HQ (d), respectively.

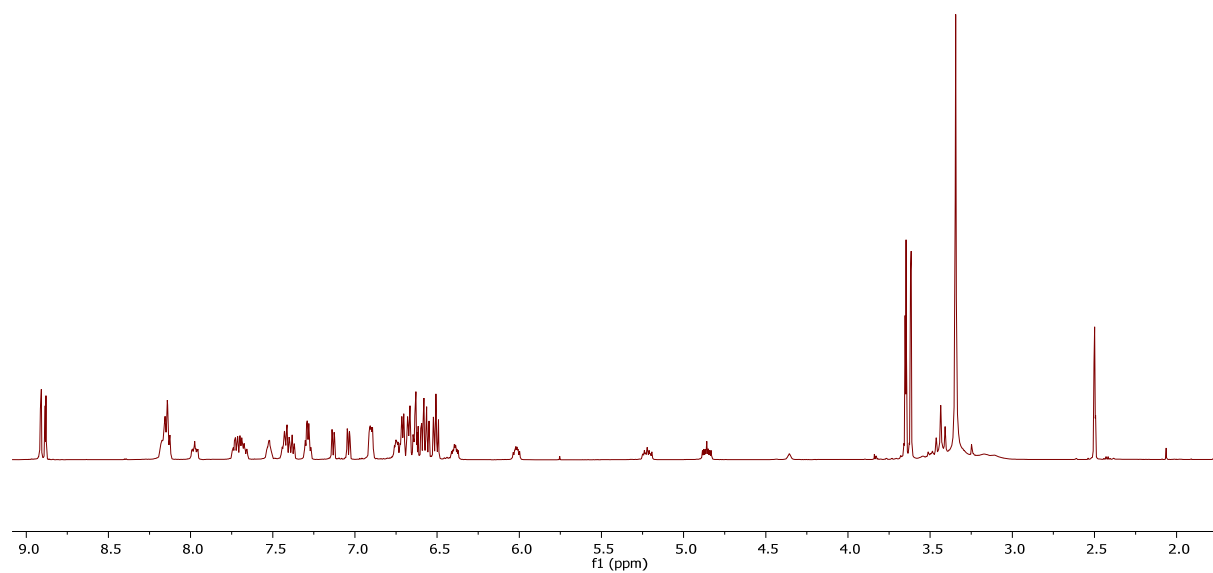

**Figure S9.**  $^1\text{H}$  NMR of DOPO-Van.

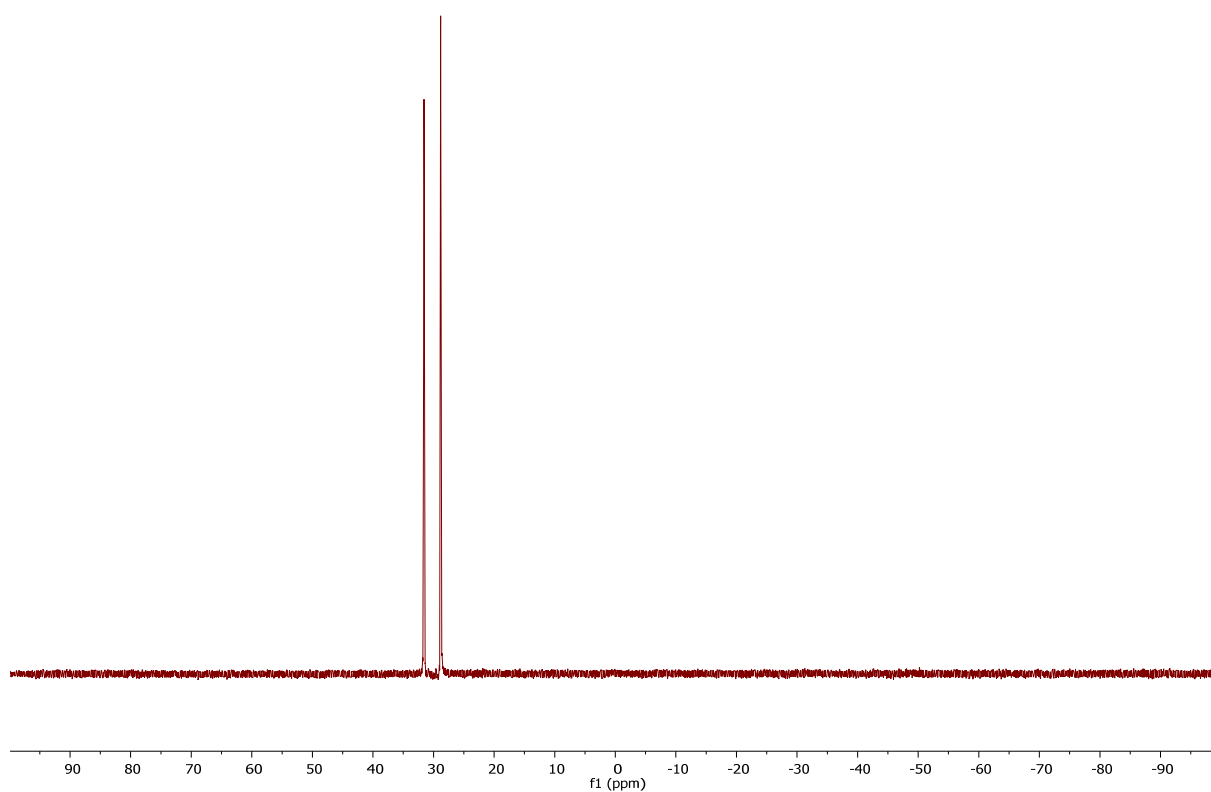

**Figure S10.**  $^{31}\text{P}$  NMR of DOPO-Van.

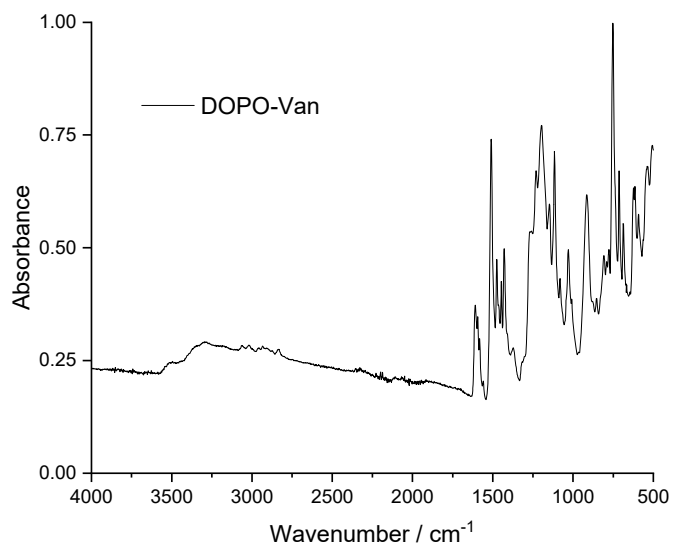

**Figure S11.** FTIR spectra of DOPO-Van.

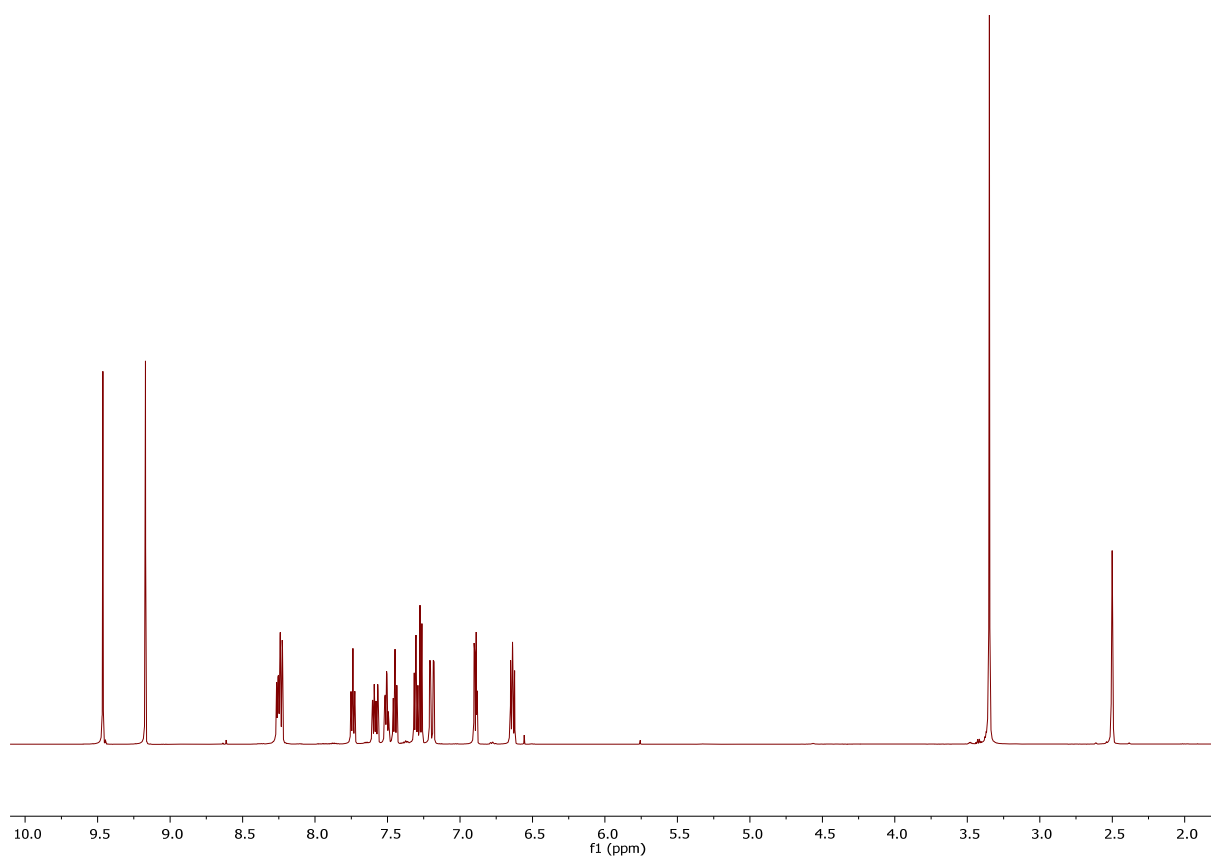

**Figure S12.**  $^1\text{H}$  NMR of DOPO-HQ.

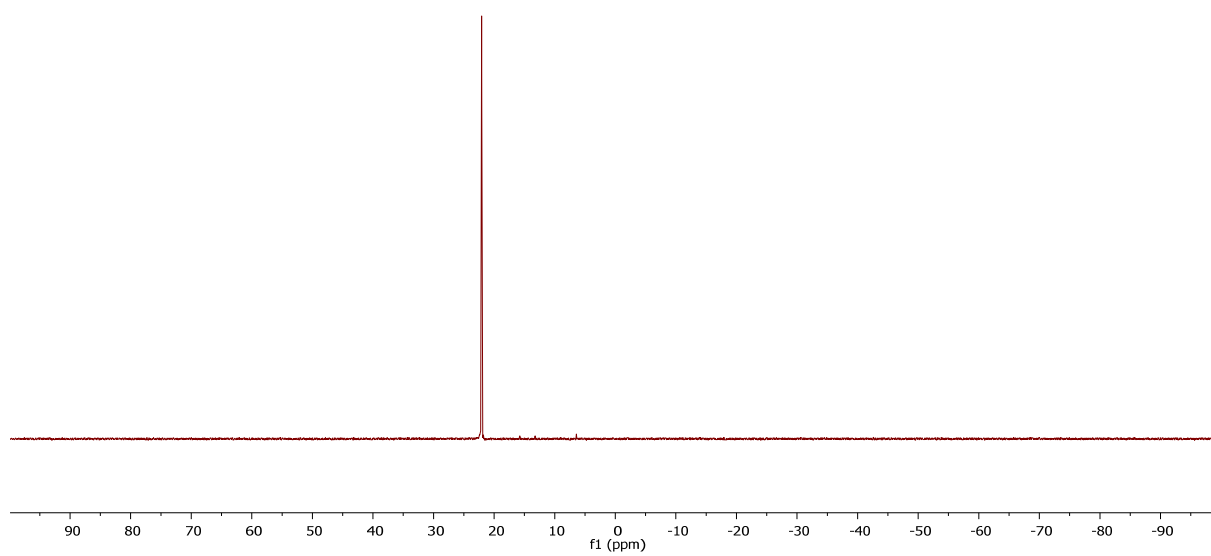

**Figure S13.**  $^{31}\text{P}$  NMR of DOPO-HQ.

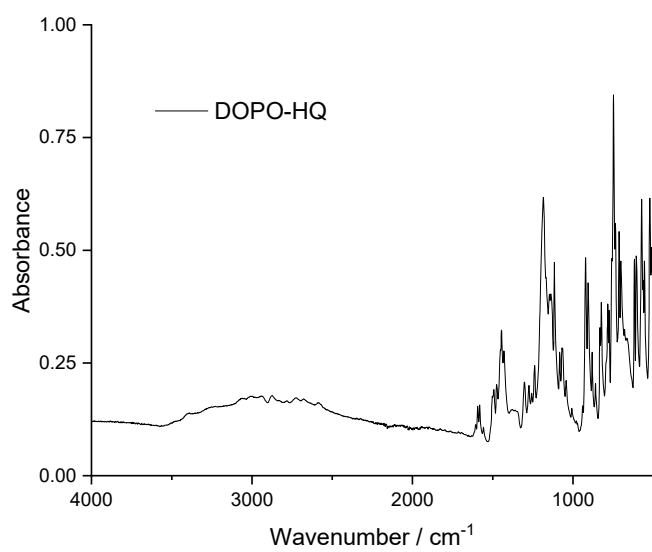

**Figure S14.** FTIR spectra of DOPO-HQ.

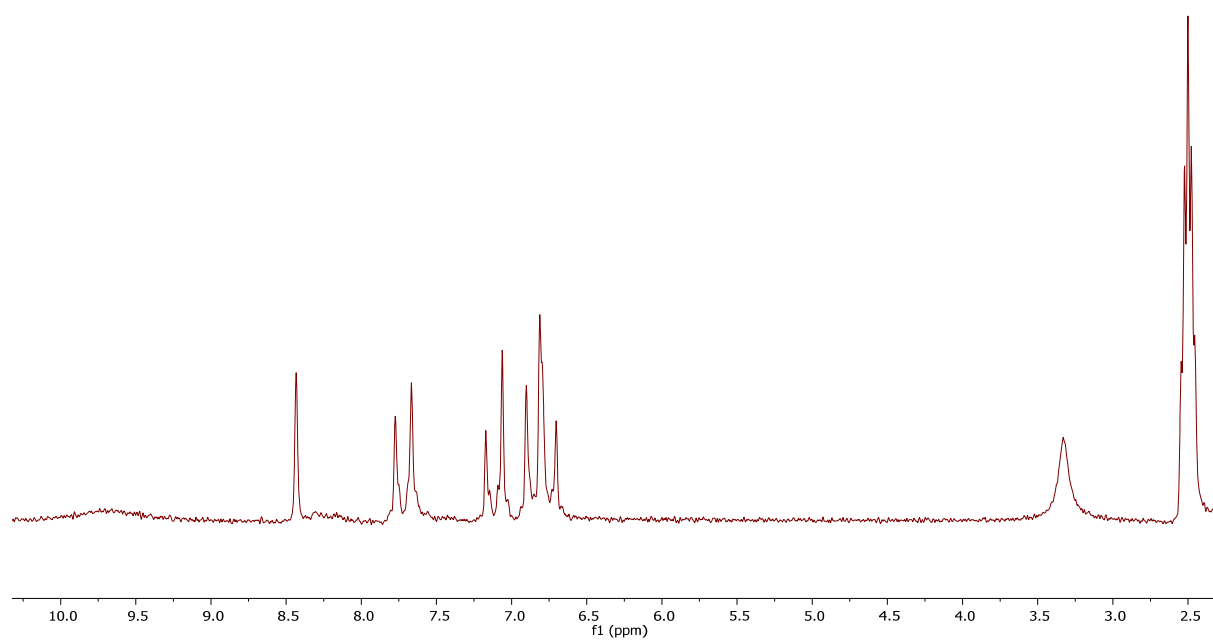

**Figure S15.** <sup>1</sup>H NMR of **1**.

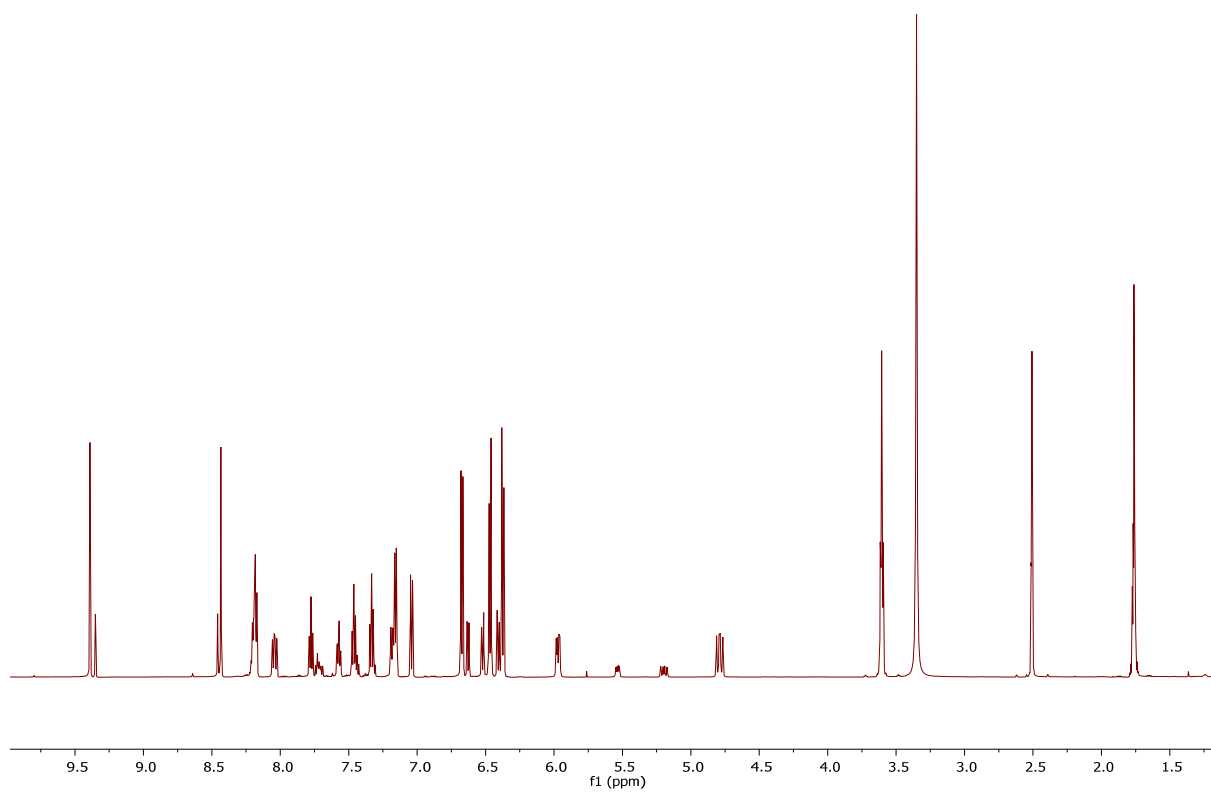

**Figure S16.**  $^1\text{H}$  NMR of DOPO-AP.

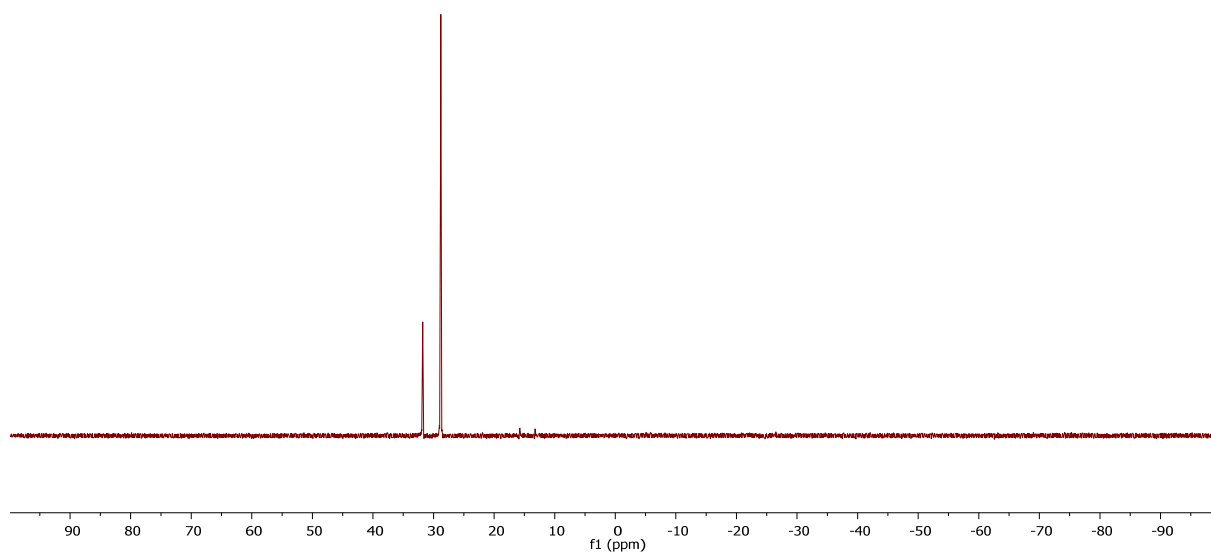

**Figure S17.**  $^{31}\text{P}$  NMR of DOPO-AP.



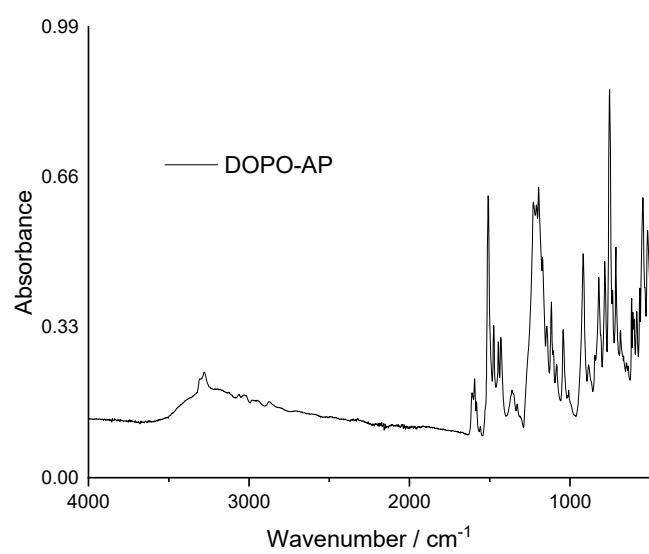

**Figure S18.** FTIR spectra of DOPO-AP.
